# Supplementary material for: Seed-mediated growth of palladium nanocrystals: The effect of pseudo-halide thiocyanate ions
Source: Royal Society of Chemistry journal article supplement (doi:10.1039/c0nr00622j), 2010-12-18
Supplement: c0nr00622j.pdf [file c0nr00622j.pdf]

## Supporting Information

### Seed-mediated Growth of Palladium Nanocrystals: The Effect of Pseudo-Halide Thiocyanate Ions

Ling Zhang<sup>a,b</sup> Wenxin Niu<sup>b</sup> and Guobao Xu,<sup>\*a</sup>

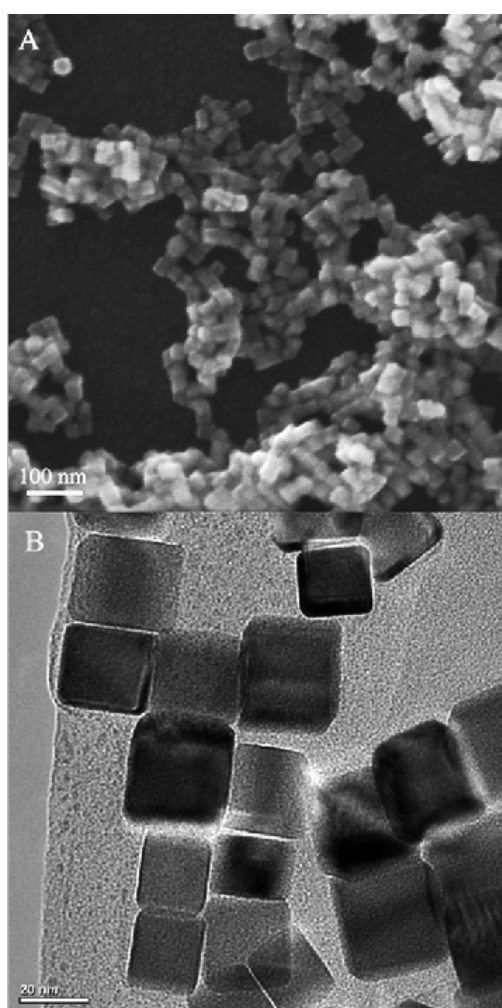

Fig.S1 SEM (A) and TEM (B) images of the palladium seeds.

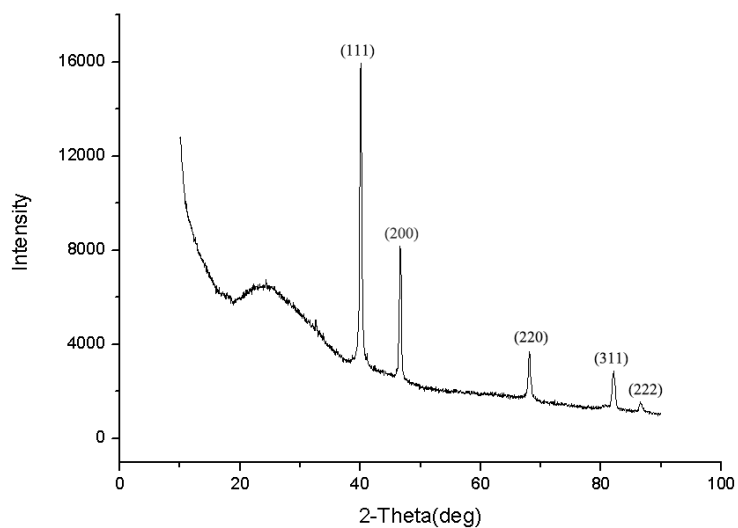

Fig.S2 XRD pattern of the palladium seeds.

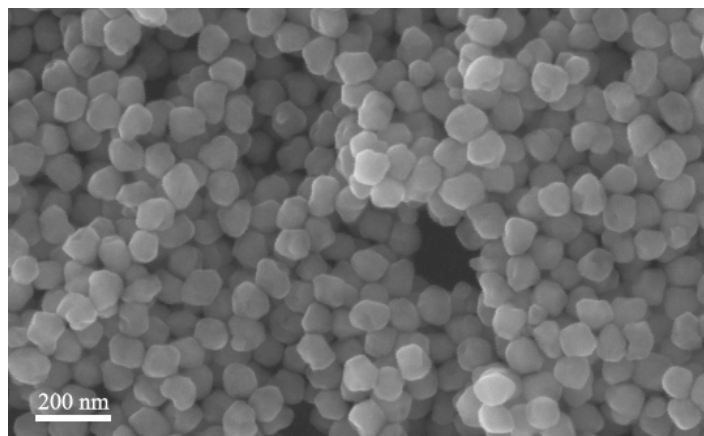

Fig.S3 SEM image of the palladium nanocrystals obtained in the presence of 10  $\mu$ M KSCN at 60 °C.

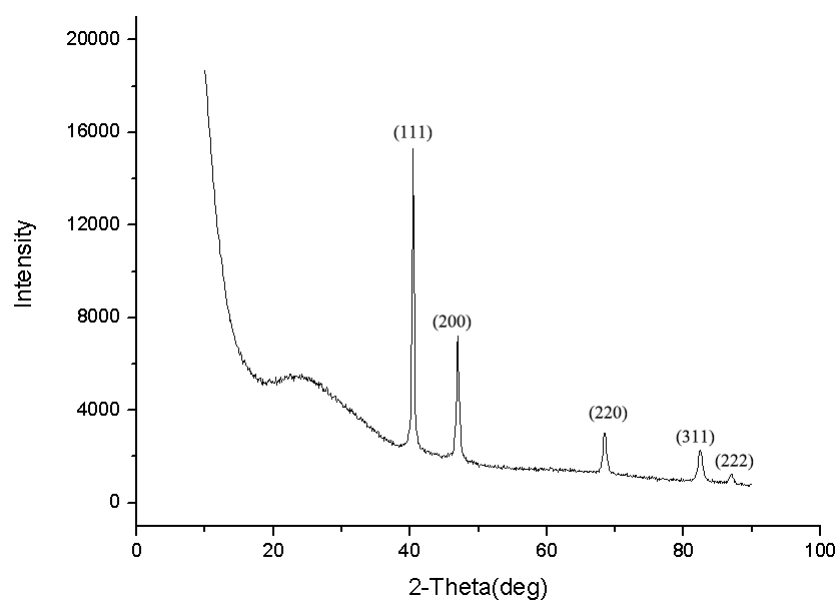

Fig.S4 XRD pattern of the palladium nanocrystals obtained in the presence of 10  $\mu$ M KSCN at 60°C.
